# Supplementary material
Source: PubMed Central journal article supplement (PMC3778155)
Supplement: NIHMS503548-supplement-1.pdf [file NIHMS503548-supplement-1.pdf]

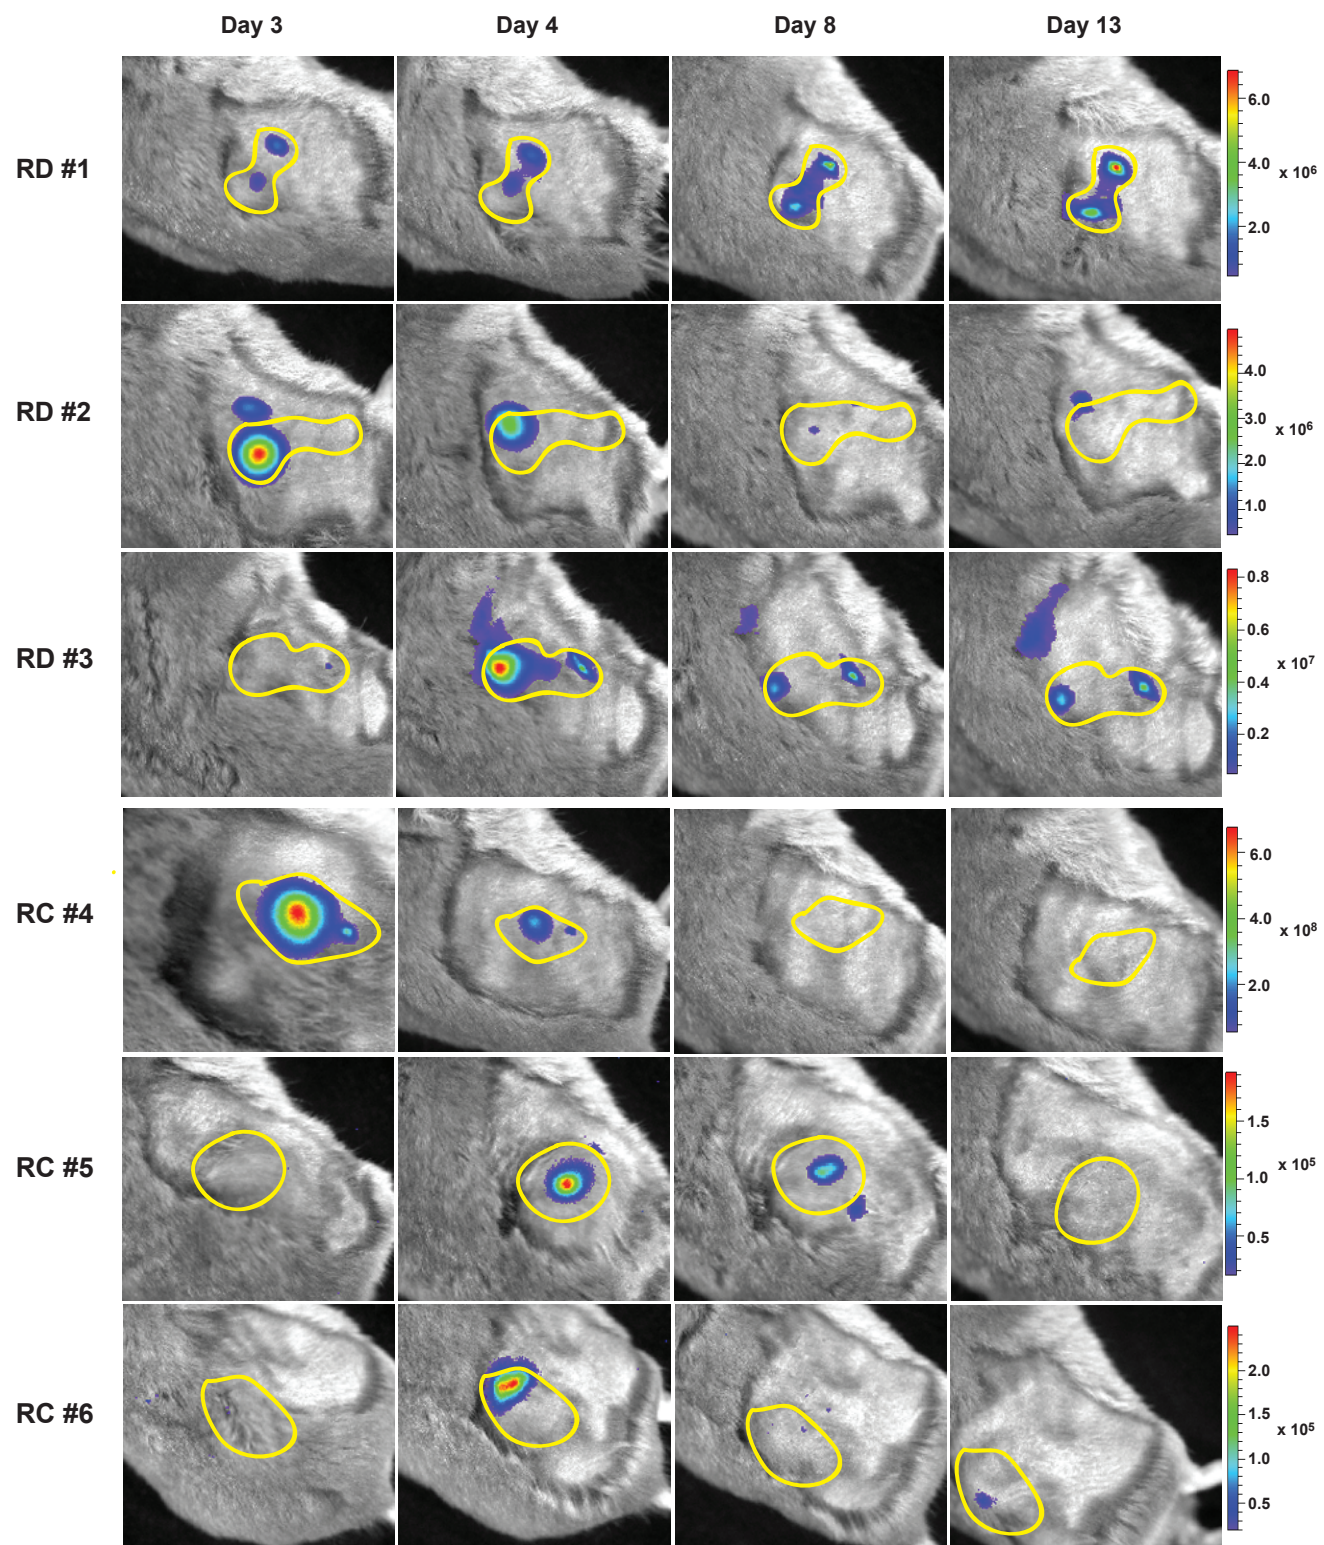

**Supplementary Figure 1. Vectors remain confined near the injection site in SHPC6 tumors.** SHPC6 tumors were injected once with either AdRD-Luc (RD) or 007-Luc (RC). Images were taken of 6 different animals on the days specified. Yellow line demarcates the approximate tumor location. Intensity scales are added for each animal.
